# Supplementary material for: Step-by-step social life cycle assessment framework: a participatory approach for the identification and prioritization of impact subcategories applied to mobility scenarios
Source: Springer Nature journal article supplement (doi:10.1007/s11367-021-01988-w), 2021-11-10

Step-by-step Social Life Cycle Assessment: A participatory approach for the identification and prioritization of impact subcategories for mobility scenarios

Ghada Bouillass, Isabelle Blanc and Paula Pérez-Lopez

# Step-by-step Social Life Cycle Assessment framework: A participatory approach for the identification and prioritization of impact subcategories applied to mobility scenarios

| <b>Authors</b>    | <b>Affiliation</b>                                                                              |
|-------------------|-------------------------------------------------------------------------------------------------|
| Ghada BOUILLASS   | MINES ParisTech, PSL Research University, Centre Observation, Impacts, Energie (O.I.E.), France |
| Isabelle BLANC    | MINES ParisTech, PSL Research University, Centre Observation, Impacts, Energie (O.I.E.), France |
| Paula PEREZ-LOPEZ | MINES ParisTech, PSL Research University, Centre Observation, Impacts, Energie (O.I.E.), France |

## **Corresponding author:**

- Ghada BOUILLASS
- [ghada.bouillass@mines-paristech.fr](mailto:ghada.bouillass@mines-paristech.fr)
- +33760905470

## **Keywords (6 to 8)**

S-LCA, participatory approach, stakeholder categories, impact subcategories, social indicators, PSILCA database, electric vehicles, social sustainability

# S1-Supporting information

## Stakeholders' identification following each life cycle stage in the mobility sector

Table 1 Listing of stakeholder categories and sub-stakeholders for each life cycle stage in the automotive sector

| Life cycle stages    | Stakeholders' categories | Sub-Stakeholders                      | Definition                                                                                                                                                                                                                                | Type of the relation                                                                                                                                                                                                              |
|----------------------|--------------------------|---------------------------------------|-------------------------------------------------------------------------------------------------------------------------------------------------------------------------------------------------------------------------------------------|-----------------------------------------------------------------------------------------------------------------------------------------------------------------------------------------------------------------------------------|
| <b>Manufacturing</b> | Workers                  | Employees                             | All employees (males and females) in the extraction of raw materials (minerals' extraction) and manufacturing of components (batteries, powertrains, etc.) and final products (internal combustion engine vehicles and electric vehicles) | <b>Affected</b> by the organization practices and decisions.                                                                                                                                                                      |
|                      |                          | Migrant employees                     | The share of migrant employees / total number of employees in the sector<br>Changes following the regulatory context                                                                                                                      | <b>Affected</b> by the organization practices and decisions.                                                                                                                                                                      |
|                      |                          | Child labor                           | The share of child labor in the sector (males and females)<br>Changes following the regulatory context                                                                                                                                    | <b>Affected</b> by the organization practices and decisions.                                                                                                                                                                      |
|                      |                          | Worker unions                         | Representative entities for employees in the organization and or the sector.                                                                                                                                                              | <b>Concerned</b> about the social and socio-economic risks generated by specific activities on the workers.<br><b>Could influence</b> the decision-making to protect workers' rights in the organization                          |
| Value Chain Actors   |                          | Manufacturer                          | Designer of and developer of the final product / technology                                                                                                                                                                               | <b>Directly involved</b> in the decision-making process                                                                                                                                                                           |
|                      |                          | Suppliers / Creditors and Contractors | Industrial actors and private entities that are linked to the supply chain of the product/technology                                                                                                                                      | <b>Involved</b> in the decision-making process / supply chain of the product/technology                                                                                                                                           |
|                      |                          | Shareholders                          | Particular partner, who are investor in capital, the owner of a given share of the activity that gives him the prerogatives in the functioning of the company and its decisions                                                           | <b>Directly involved</b> in the decision-making process and could have significant influence/control                                                                                                                              |
| Society              |                          | Government                            | Define regulation and transportation / manufacturing policies on the national scale                                                                                                                                                       | <b>Concerned</b> by the environmental and social and socio-economic performance of organizations. And have great <b>influence</b> on the decision- making process                                                                 |
|                      |                          | NGOs                                  | Local organization for environmental protection/ air quality and a local scale/ noise, biodiversity, etc. data privacy of users, etc.                                                                                                     | <b>Concerned</b> by the environmental and social and socio-economic performance of organizations. And have great <b>influence</b> on the decision- making process                                                                 |
| Local Community      |                          | Local Authority                       | Local authorities that define the local politics and regulations to be respected by the organizations                                                                                                                                     | <b>Concerned</b> by the environmental and social and socio-economic performance of available products/technologies in the market. <b>Define local actions</b> and plans to manage products/organizations impacts on a local scale |

Step-by-step Social Life Cycle Assessment: A participatory approach for the identification and prioritization of impact subcategories for mobility scenarios

Ghada Bouillass, Isabelle Blanc and Paula Pérez-Lopez

|                                  |                           |                   |                                                                                                                                                                                     |                                                                                                                                                                                                                                                                      |
|----------------------------------|---------------------------|-------------------|-------------------------------------------------------------------------------------------------------------------------------------------------------------------------------------|----------------------------------------------------------------------------------------------------------------------------------------------------------------------------------------------------------------------------------------------------------------------|
|                                  |                           | Local community   | Local residents at a given geographical area where extraction/manufacturing activities take place                                                                                   | <b>Directly and indirectly affected</b> by the products/technologies and activities related to the manufacturing                                                                                                                                                     |
| <b>Distribution And purchase</b> | Workers                   | Workers           | Employees in the distribution and purchase stages (male and female)                                                                                                                 | <b>Affected</b> by the organization practices / local / national transportation policies                                                                                                                                                                             |
|                                  | Users                     | Users             | Person or group of persons that would buy the vehicle technology                                                                                                                    | <b>Directly affected</b> by                                                                                                                                                                                                                                          |
|                                  | Society                   | Governments       | Actors' decision-makers at the national level for mobility policy and regulations and objectives (reduction of GHG emissions)                                                       | <b>Directly involved</b> in the decision-making: subvention policies for EV / Incentive taxes related to petroleum products                                                                                                                                          |
| <b>USE PHASE</b>                 | Users                     | Users             | Primary users of transportation technologies (Bikes, EV, Buses) and mobility services (personal, public, and shared transport)                                                      | <b>Directly affected</b> by the product (vehicle technology and mobility services) and practices of the: Operators of the mobility service/providers of the technology and insurance and other mobility services/ also affected by the local/national policies (ZER) |
|                                  | Local community           | Local community   | Local residents at a given geographical area characterized by x types of transportation vehicles / and y mobility services / z mobility infrastructures                             | <b>Affected</b> by environmental, social and socio-economic aspects related to technologies/ mobility services (noise, local air quality, local employment, accessibility to mobility services and infrastructures for EV)                                           |
|                                  | Society                   | Governments       | decision-makers at the national level for mobility policy and regulations and objectives (reduction of GHG emissions)                                                               | <b>Directly involved</b> in the decision-making: subvention policies for EV / Incentive taxes related to petroleum products                                                                                                                                          |
|                                  |                           | NGOs              | Local organization for environmental protection/ air quality and a local scale/ noise, biodiversity, etc. data privacy of users, etc.                                               | <b>Concerned</b> by the environmental and social and socio-economic performance of organizations. And have great <b>influence</b> on the decision- making process                                                                                                    |
|                                  | Value chain actors        | Constructors      | Road's infrastructures, charging infrastructures and other mobility infrastructures                                                                                                 | <b>Involved</b> in the decision-making and concerned by the local and national mobility policies – subventions for charging infrastructures                                                                                                                          |
|                                  |                           | Insurance         | Providers of insurance services to the different users (primary and secondary: workers)                                                                                             | <b>Involved</b> in the decision-making process (private actors) could have directly affected on users                                                                                                                                                                |
|                                  |                           | Service operators | Providers of mobility platforms (MaaS) / mobility services providers                                                                                                                | <b>Involved</b> in the decision-making process. Could have direct impacts on users. Concerned by the national/local mobility policies                                                                                                                                |
|                                  | Workers (secondary users) | Workers           | Independent repairmen or those affiliated to the producers' organizations. Bus drivers, taxi drivers, and other workers in the operating stage of the vehicle (deliveries included) | <b>Affected</b> by the organizations practices and local and national regulatory context                                                                                                                                                                             |

Step-by-step Social Life Cycle Assessment: A participatory approach for the identification and prioritization of impact subcategories for mobility scenarios

Ghada Bouillass, Isabelle Blanc and Paula Pérez-Lopez

|                           |                       |                                                                                                                       |                                                                                                                                                                 |                                                                                                                                           |
|---------------------------|-----------------------|-----------------------------------------------------------------------------------------------------------------------|-----------------------------------------------------------------------------------------------------------------------------------------------------------------|-------------------------------------------------------------------------------------------------------------------------------------------|
| <b>FINAL<br/>DOSPOSAL</b> | Value Chain<br>Actors | Batteries<br>Collectors                                                                                               | Actors involved in the secondary use/application of the battery.                                                                                                | <b>Involved</b> in the decision-making process. Concerned by the local and national                                                       |
|                           |                       | Other materials<br>collectors                                                                                         | Actors involved in the recycling of the vehicles                                                                                                                | <b>Involved</b> in the supply chain, concerned by the national/local regulatory context                                                   |
|                           |                       | Manufacturer                                                                                                          | Actors involved in the recycling of vehicles and related components and raw materials. “Filière REP”                                                            | <b>Involved</b> in the supply chain, concerned by the national/local regulatory context                                                   |
|                           | User                  | Users of the secondary products                                                                                       | Users of 2 <sup>nd</sup> life of vehicles, batteries for energy storage                                                                                         | <b>Affected</b> by the technology/component and local/national regulations                                                                |
|                           | Local Community       | Local Authority                                                                                                       | Local regulations and actions for the final disposal of vehicle technologies and components circularity.                                                        | <b>Involved</b> in the decision-making process, promotion of circular economy of the materials and vehicles components at the local scale |
|                           | Society               | NGOs                                                                                                                  | Local organization for environmental protection/ air quality and a local scale/ noise, biodiversity, etc.                                                       | <b>Concerned</b> by the local policies and impacts on the various stakeholders                                                            |
| Governments               |                       | decision-makers at the national level for mobility policy and regulations and objectives (reduction of GHG emissions) | <b>Directly involved</b> in the decision-making: subvention policies for EV batteries (Filière REP in France) + definition of regulations of vehicles recycling |                                                                                                                                           |

## S2-Supporting information

### Survey 1 (was addressed to users)

#### List of questions: 7 questions

1<sup>st</sup> part: Social and socio-economic issues related to users (passengers) in mobility

- 1- **I am mainly user of:**
  - a. Personal transportation
  - b. Public transportation
  - c. Shared transportation
  - d. Combination of personal and collective
  - e. Combination of shared and Public
  - f. Combination of shared and personal
- 2- **Public transportation: What are the social and socio-economic issues that you consider critical concerning this transportation mode?**
- 3- **Personal transportation: What are the social and socio-economic issues that you consider critical concerning this transportation mode?**
- 4- **Shared transportation: What are the social and socio-economic issues that you consider critical concerning this transportation mode?**
- 5- **In the context of an electric mobility transition, what would be the social and socio-economic issues that you are most concerned about?**
  - a. Transparency
  - b. Health
  - c. Consumer privacy
  - d. Performance of the communication System
  - e. Safety (accidents, insecurity feeling, aggression, and harassment)
  - f. End of life responsibility
  - g. Availability and interoperability of infrastructures
  - h. Accessibility and affordability
  - i. Feedback mechanism
- 6- **Do you have any comments or other suggestions for social and economic issues that have not been identified?**

2<sup>nd</sup> part: Social and socio-economic issues related to workers (question 7) and local communities (question 8) for which users are concerned.

**According to you, what is the order of importance of the information provided by manufacturers on the social and socio-economic issues associated with workers in the production phase (outside Europe)?**

- a. Health and safety of workers
  - b. Child labor
  - c. Forced labor
  - d. Gender equity
  - e. Working hours
  - f. Freedom of association and collective bargaining
  - g. Fair salary
  - h. Equal opportunities/discrimination
  - i. Social benefits/social security
- 7- **According to you, what is the order of importance of the information provided by the manufacturers on the social and socio-economic issues associated with the local communities in the production phase (outside Europe)?**
- a. Local employment

Step-by-step Social Life Cycle Assessment: A participatory approach for the identification and prioritization of impact subcategories for mobility scenarios

Ghada Bouillass, Isabelle Blanc and Paula Pérez-Lopez

- b. Delocalization and migration
  - c. Safe and healthy living conditions
  - d. Access to immaterial resources
  - e. Access to material resources
  - f. Community engagement
- 

## Survey 2 (was addressed to worker unions)

### List of questions: 7 questions

- 1- Which category of workers do you represent?**
    - a. Auto workers' unions - manufacturing, recycling, repair
    - b. Urban Transport Unions
    - c. VTC Drivers' Unions
  - 2- How would you rate the following social and socio-economic issues for your category of workers?**  
**Matrix performance levels (very low, low, positive, very positive, I don't know) / Social and socio-economic issues**
  - 3- In which order of priority do you attribute the social and socio-economic issues (positive or negative) associated with your category of workers?**
    - a. Health and safety of workers
    - b. Child labor
    - c. Forced labor
    - d. Gender equity
    - e. Working hours
    - f. Freedom of association and collective bargaining
    - g. Fair salary
    - h. Equal opportunities/discrimination
    - i. Social benefits/social security
  - 4- As part of the shift to electric mobility, is/will your category of worker be directly affected?**
    - a. Yes
    - b. No
  - 5- If yes in question (4):**
  - 6- In your opinion, which type of mobility (electric or conventional) presents the highest risk to your category of workers with regard to each of the following issues?**
    - a. Health and safety of workers
    - b. Child labor
    - c. Forced labor
    - d. Gender equity
    - e. Working hours
    - f. Freedom of association and collective bargaining
    - g. Fair salary
    - h. Equal opportunities/discrimination
    - i. Social benefits/social security
  - 7- Do you have any comments or other suggestions for social and economic issues that have not been identified?**
-

## Survey 3: Industrial, academic, and public actors –

### 11 questions and 5 parts corresponding to the five stakeholder categories

#### 1- Which category of actors do you represent?

- a. Industrial actors
- b. Public actors
- c. Academic actors

1<sup>st</sup> part: social and socio-economic issues related to users in mobility

#### 2- According to you, what are the most significant social and socio-economic issues associated with users to consider for the development of sustainable mobility? Please move the thumbnails according to the order of preference/importance you assign to each of the following issues

#### 3- Users: how do you compare the importance of these issues depending on the type of mobility (electric or conventional)?

- a. Transparency
- b. Health
- c. Consumer privacy
- d. Performance of the communication System
- e. Safety (accidents, insecurity feeling, aggression, and harassment)
- f. End of life responsibility
- g. Availability and interoperability of infrastructures
- h. Accessibility and affordability
- i. Feedback mechanism

2<sup>nd</sup> part: social and socio-economic issues related to workers

#### 4- According to you, what are the most significant social and socio-economic issues associated with workers in the extraction, production and transport phases? Please move the thumbnails according to the order of preference/importance you assign to each of the following issues

#### 5- According to you, what are the most significant social and socio-economic issues associated with workers in the use phase - drivers, infrastructure workers, service managers, etc.? (France)? Please move the thumbnails according to the order of preference/importance you assign to each of the following issues

#### 6- Workers: how do you compare the importance of these issues depending on the type of mobility (electric or conventional)?

- a. Health and safety of workers
- b. Child labor
- c. Forced labor
- d. Gender equity
- e. Working hours
- f. Freedom of association and collective bargaining
- g. Fair salary
- h. Equal opportunities/discrimination
- i. Social benefits/social security

3<sup>rd</sup> part: social and socio-economic issues related to local communities

#### 7- What is the order of importance you attribute to the social and socio-economic issues associated with local communities (extraction-manufacturing phase and end of life)? Please move the thumbnails according to the order of preference/importance you assign to each of the following issues

#### 8- What do you think are the most significant social and socio-economic issues for local communities to consider when developing urban mobility plans (France)? Please move the thumbnails according to the order of preference/importance you assign to each of the following issues

#### 9- Local communities: how do you compare the importance of these issues depending on the type of mobility (electric or conventional)?

Step-by-step Social Life Cycle Assessment: A participatory approach for the identification and prioritization of impact subcategories for mobility scenarios

Ghada Bouillass, Isabelle Blanc and Paula Pérez-Lopez

- a. Local employment
- b. Delocalization and migration
- c. Safe and healthy living conditions
- d. Access to immaterial resources
- e. Access to material resources
- f. Community engagement

4<sup>th</sup> part: social and socio-economic issues related to value chain actors

**10- What is the order of priority you assign to the social and socio-economic issues associated with the value chain actors?** *Please move the thumbnails according to the order of preference/importance you assign to each of the following issues*

**11- Value chain actors: how do you compare the importance of these issues according to the type of mobility (electric or conventional)?**

- a. Promotion of social responsibility
- b. Fair competition
- c. Supplier relationships
- d. Respect of intellectual property rights

5<sup>th</sup> part: social and socio-economic issues for society

**12- What are the most significant social and socio-economic issues for the development of sustainable electric mobility services?** *Please move the thumbnails according to the order of preference/importance you assign to each of the following issues*

**13- Society: how do you compare the importance of these issues according to the type of mobility (electric or conventional)?**

- a. Corruption
- b. Contribution to socio-economic development
- c. Prevention and mitigation of armed conflicts
- d. Technology development



## S3-Supporting information

### 1. Life cycle stages and corresponding process activities selected from PSILCA database

| Object                                                                    | Identified process Activity in PSILCA (sectors)                                                          | Countries     |
|---------------------------------------------------------------------------|----------------------------------------------------------------------------------------------------------|---------------|
| <b>Battery production</b>                                                 | Electric Accumulator & Battery                                                                           | Thailand (TH) |
|                                                                           | Batteries                                                                                                | Japan (JP)    |
|                                                                           | Primary battery                                                                                          | USA (US)      |
| <b>Vehicles and semi-trailers production, and related main components</b> | Manufacture of motor vehicles, trailers, and semi-trailers                                               | France (FR)   |
|                                                                           | Manufacture of electrical machinery                                                                      | France (FR)   |
|                                                                           | Trade, maintenance and repair services of motor vehicles and motorcycles; retail sale of automotive fuel | France (FR)   |
|                                                                           | Recycling                                                                                                | France (FR)   |
| <b>Electricity Production and related activities</b>                      | Electrical energy, gas, steam, and hot water                                                             | France (FR)   |
|                                                                           | Mining of uranium and thorium ores                                                                       | France (FR)   |
| <b>Fuel production</b>                                                    | Coke, refined petroleum products and nuclear fuel                                                        | France (FR)   |
|                                                                           | Crude petroleum and natural gas                                                                          | France (FR)   |

## S4- Supporting information

**Prioritized impacts subcategories** (All the results for the developed participatory approach were developed using Python to analyze the surveys (jupyter notebook and the developed code could be provided if needed after a simple demand for the corresponding author)

---

### Subcategories for value chain actors

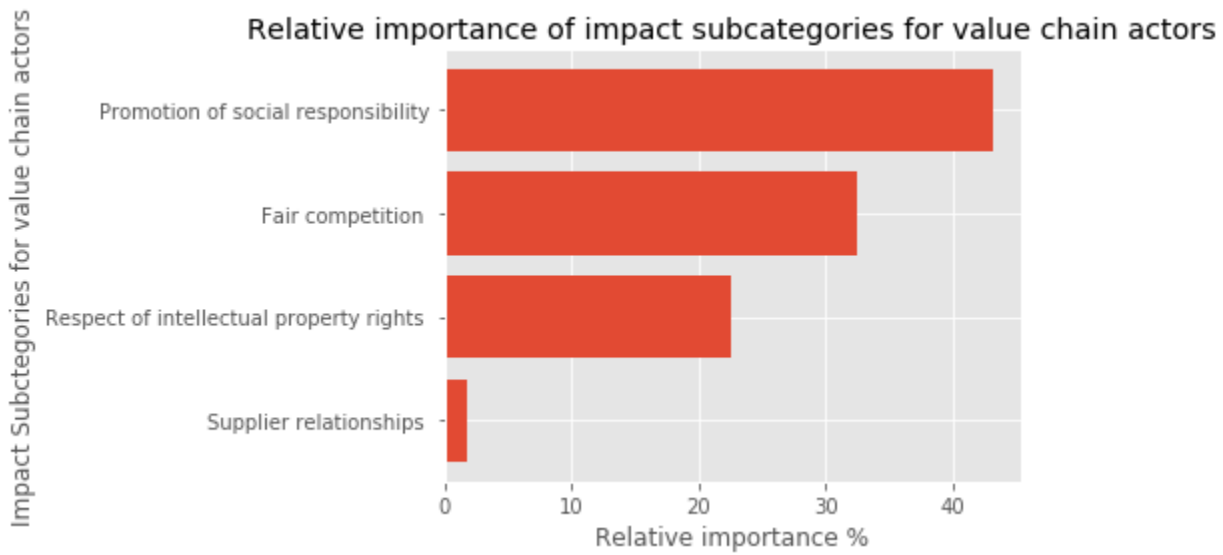

### Subcategories for society

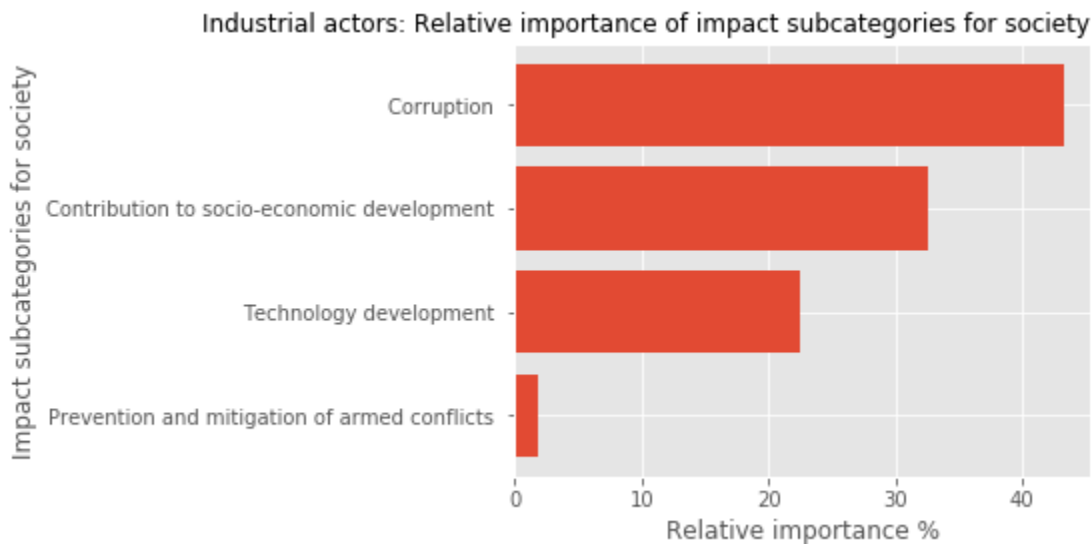

## Local communities (Outside Europe and Inside France)

**Prioritization of subcategories for local communities in France and outside Europe according to the consulted actors**

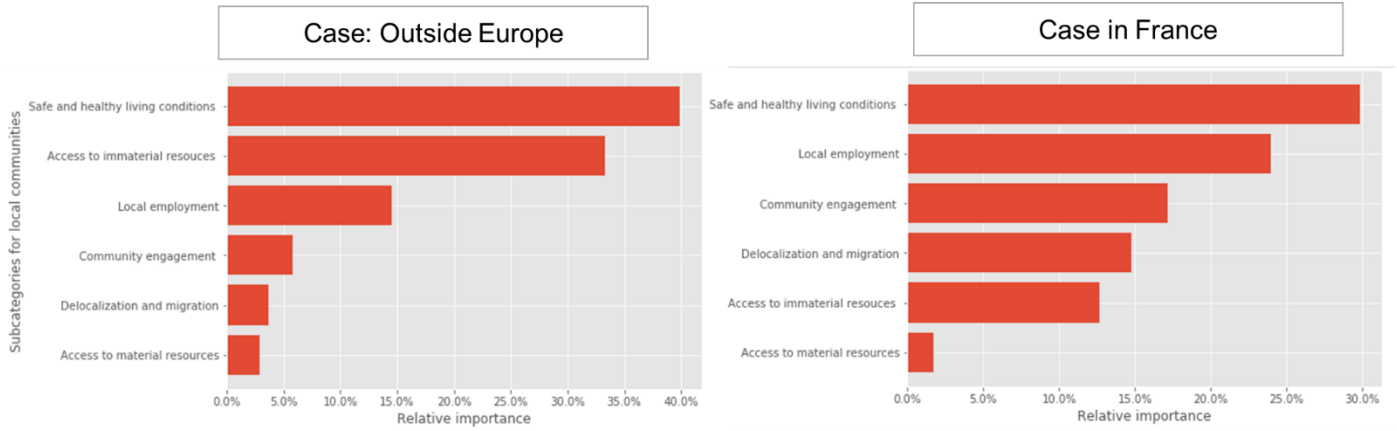

## Users' perceptions on the prioritization of workers' impact subcategories

Comparison of relative importance of subcategories for workers : Outside Europe vs France

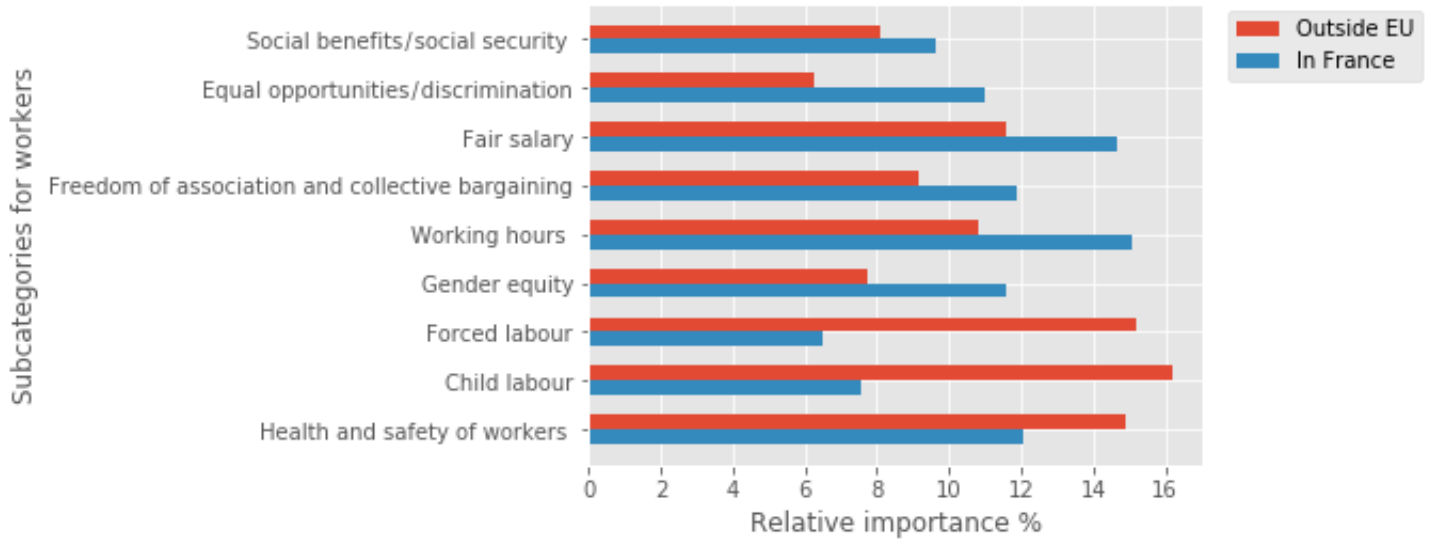

Step-by-step Social Life Cycle Assessment: A participatory approach for the identification and prioritization of impact subcategories for mobility scenarios

Ghada Bouillass, Isabelle Blanc and Paula Pérez-Lopez

## Worker unions perspectives on the subcategories related to workers

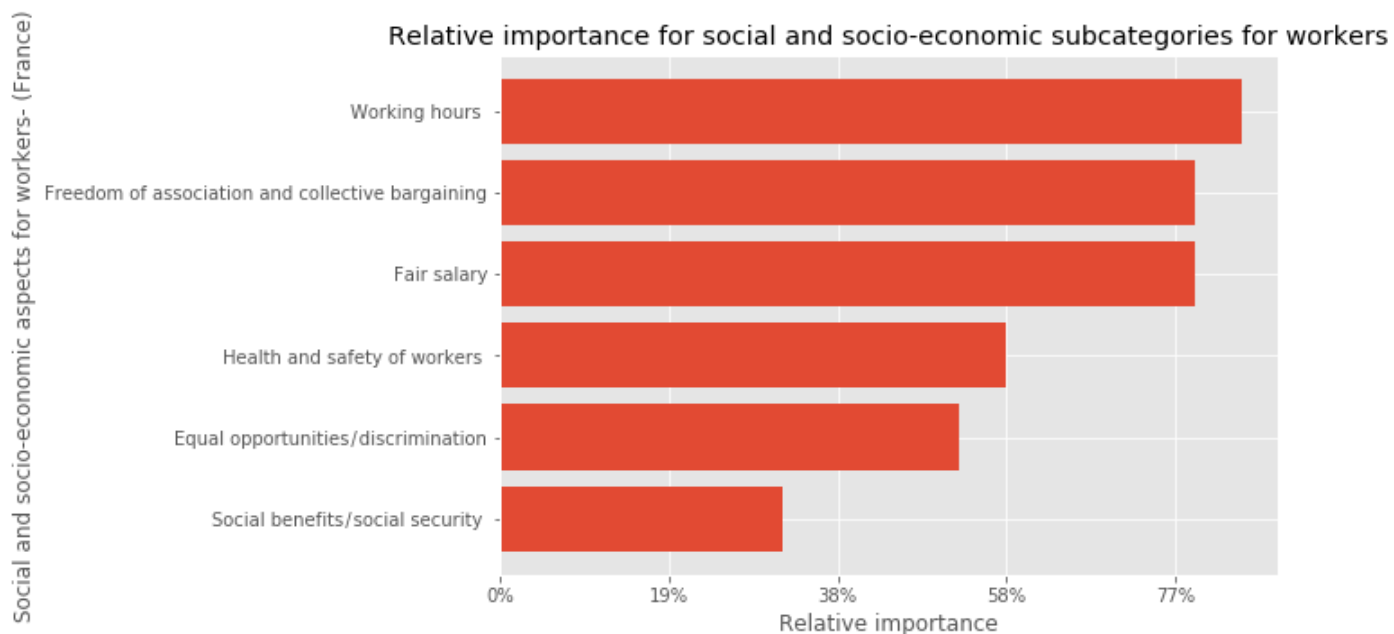

## Comparison actors' perspectives: Subcategories for workers

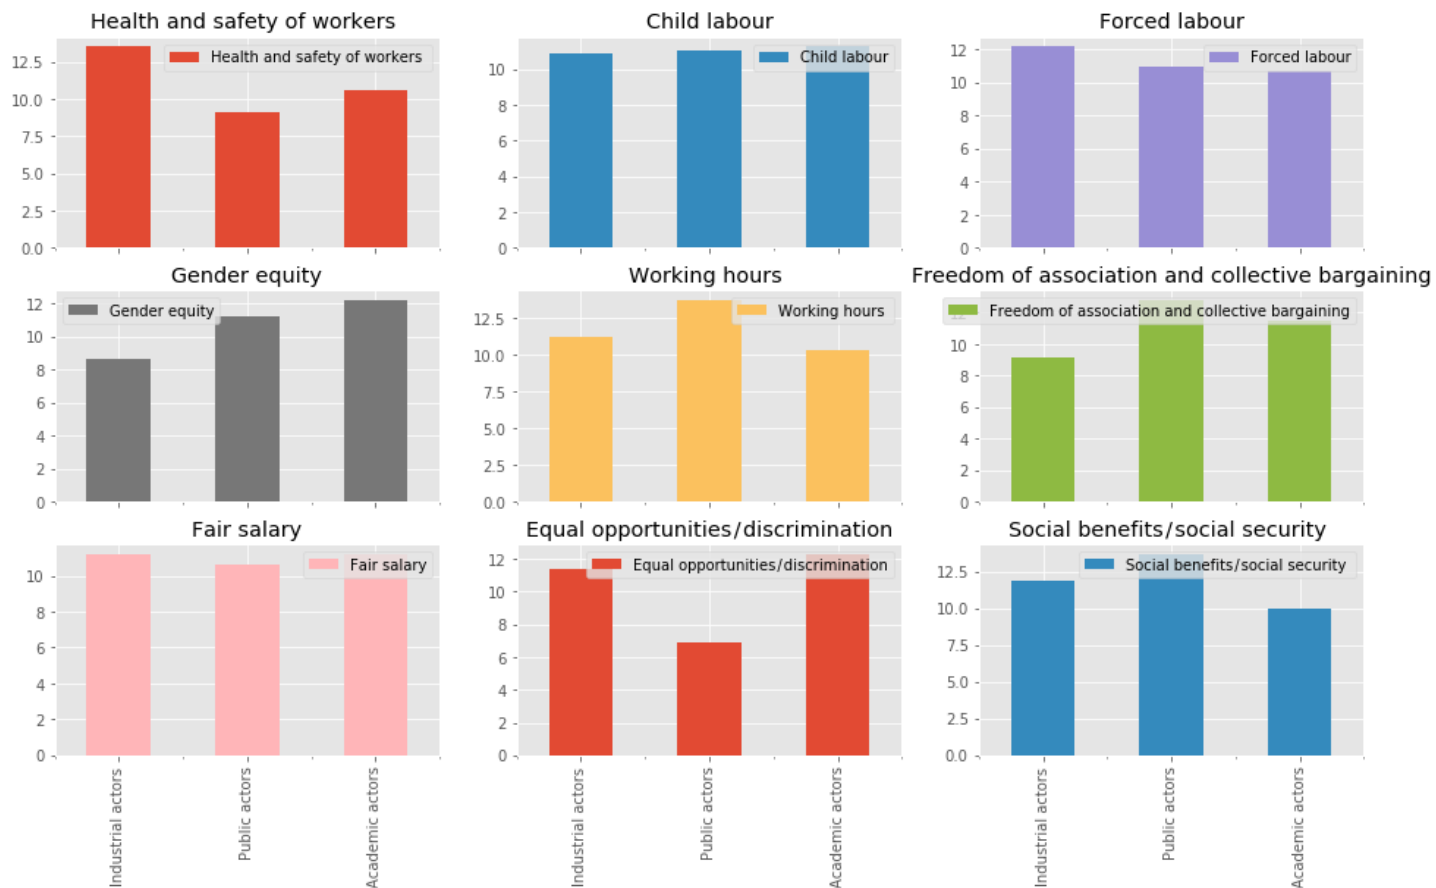

# Step-by-step Social Life Cycle Assessment: A participatory approach for the identification and prioritization of impact subcategories for mobility scenarios

Ghada Bouillass, Isabelle Blanc and Paula Pérez-Lopez

## Comparison of actors' perspectives: Subcategories for users

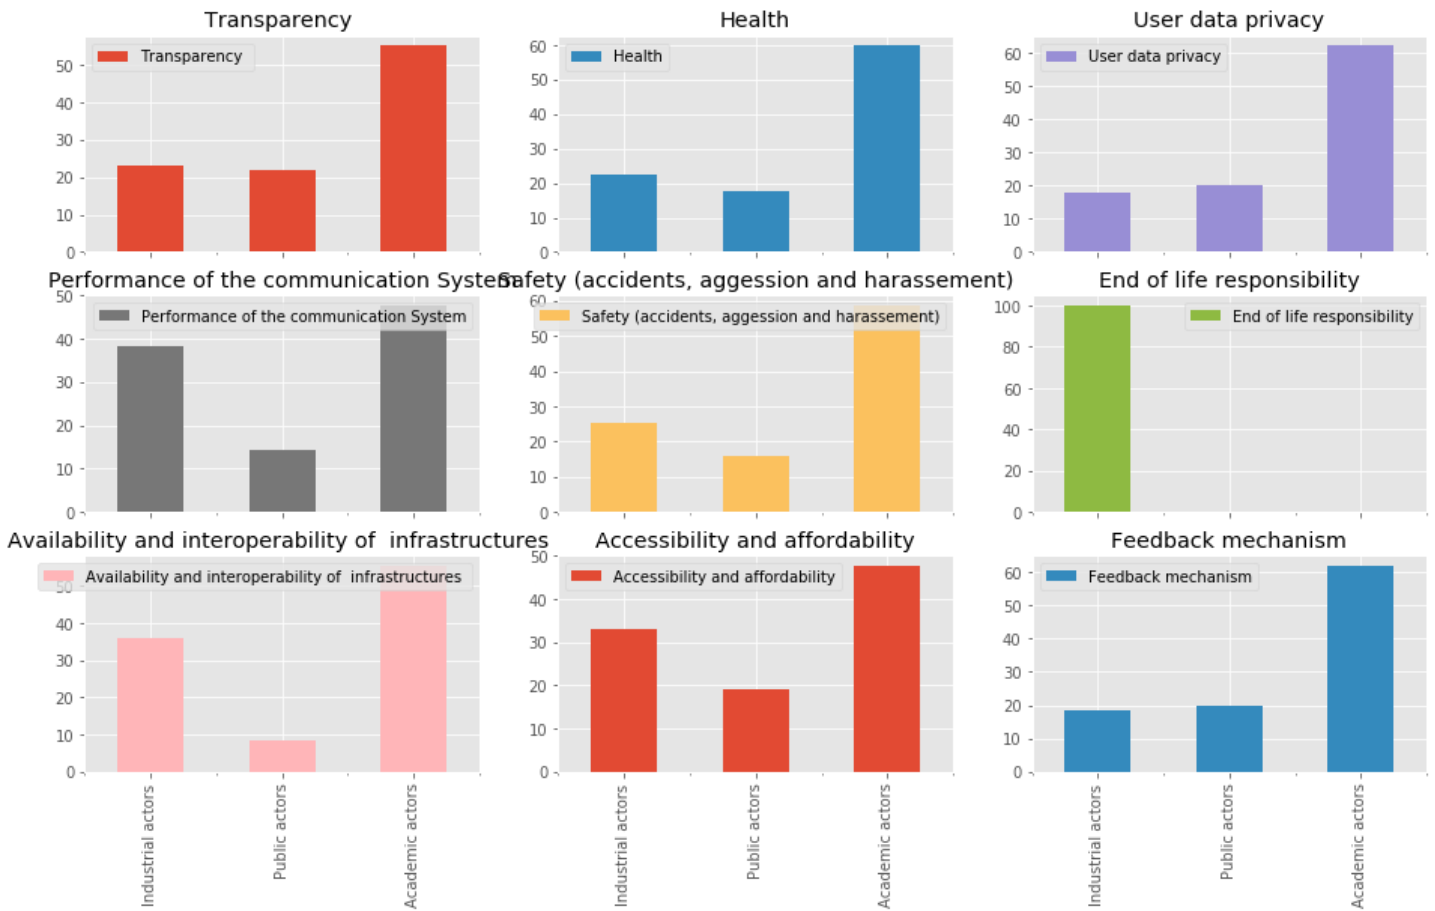

## Comparison of actors' perspectives for society' impact subcategories

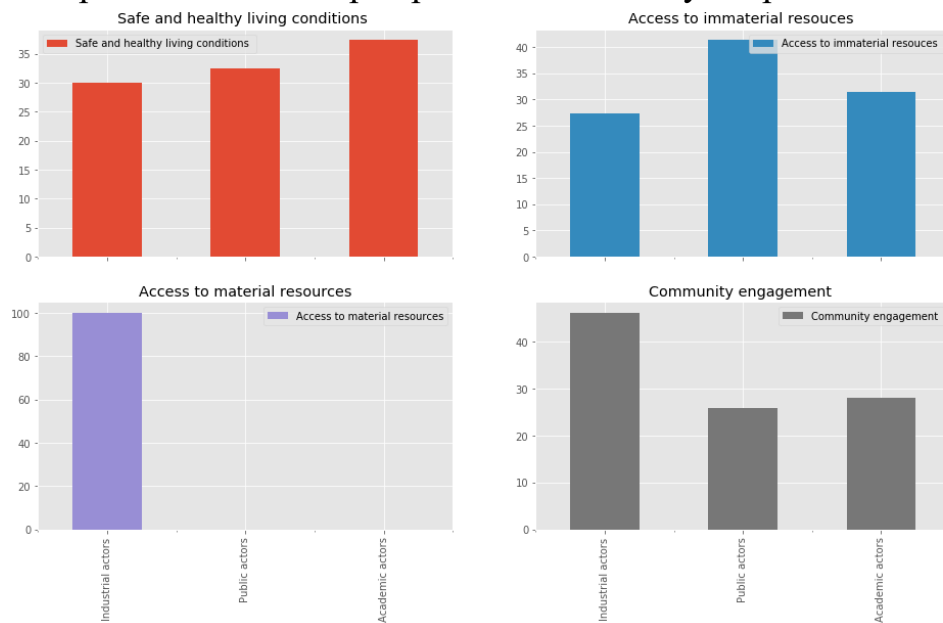

# Step-by-step Social Life Cycle Assessment: A participatory approach for the identification and prioritization of impact subcategories for mobility scenarios

Ghada Bouillass, Isabelle Blanc and Paula Pérez-Lopez

### Society's subcategories: comparison of electric mobility and conventional mobility

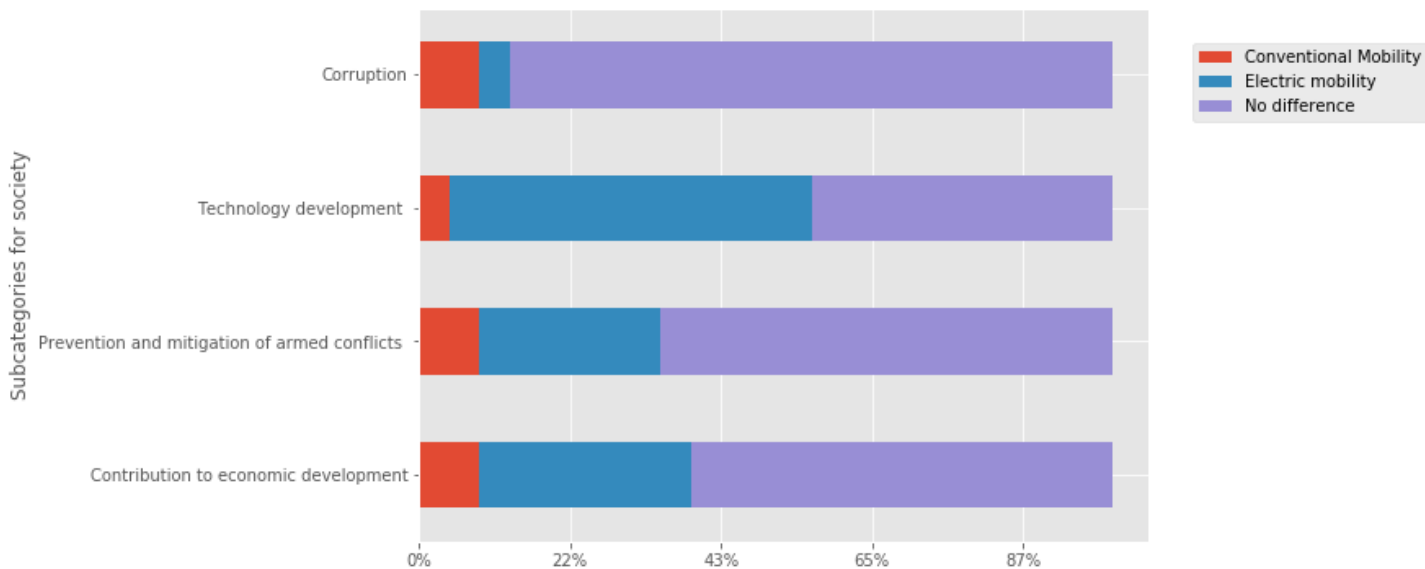

### Subcategories for value chain actors: comparison of electric mobility and conventional mobility

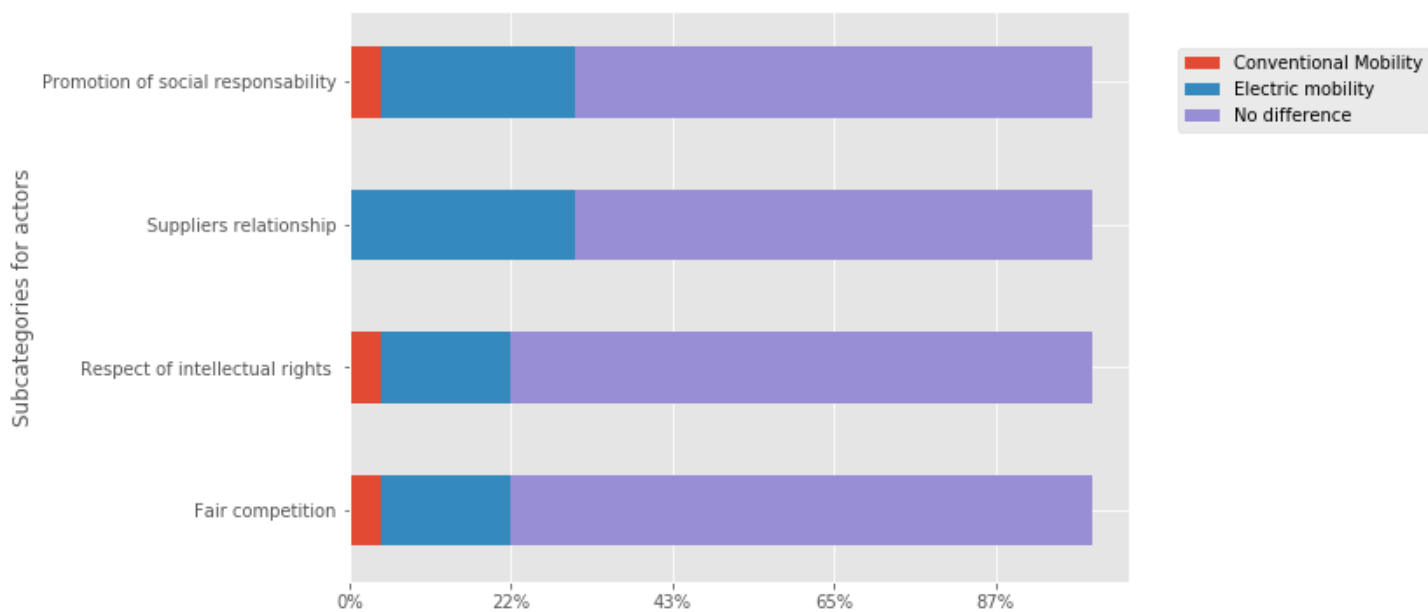

## S5- Evaluation SLCIA results

### Society and value chain actors related impact subcategories

#### Value chain actors: Fair competition impact subcategory

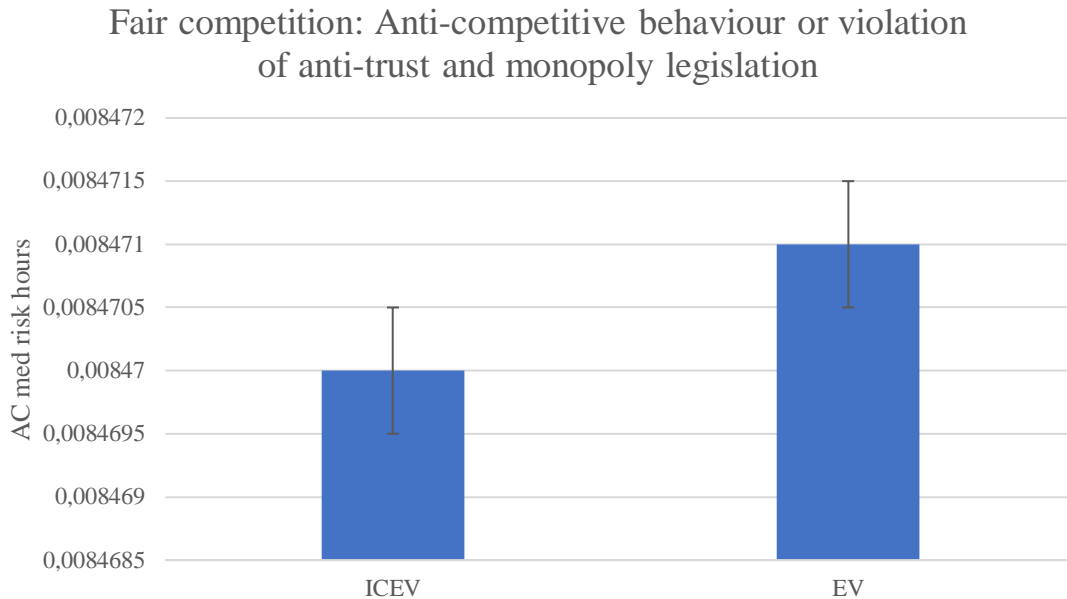

#### Value chain actors: Promotion of social responsibility

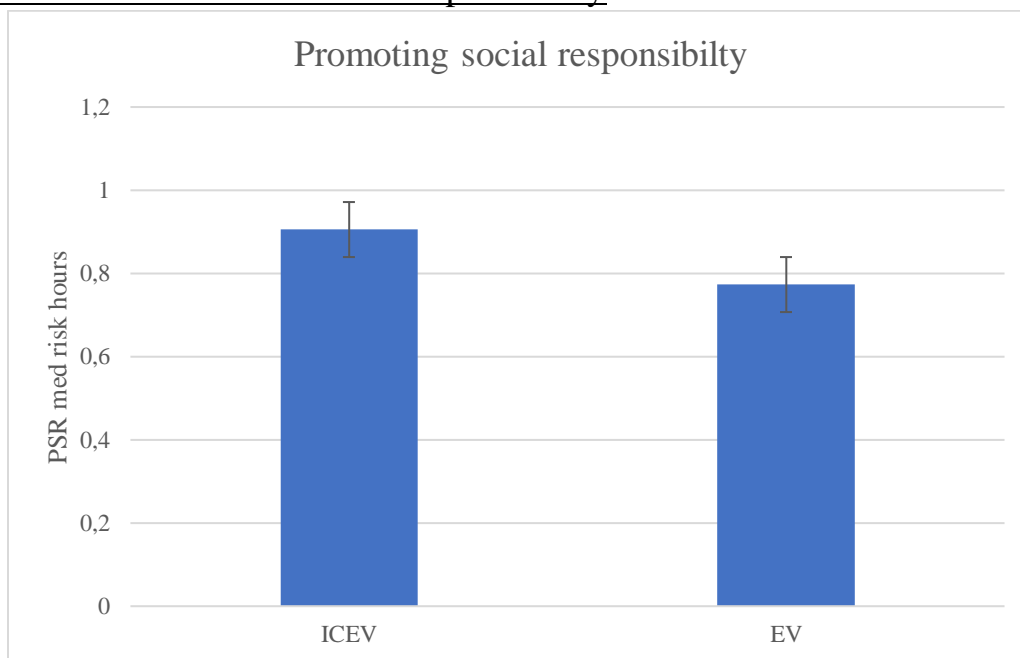

### Society: contribution to economic development



Step-by-step Social Life Cycle Assessment: A participatory approach for the identification and prioritization of impact subcategories for mobility scenarios

Ghada Bouillass, Isabelle Blanc and Paula Pérez-Lopez

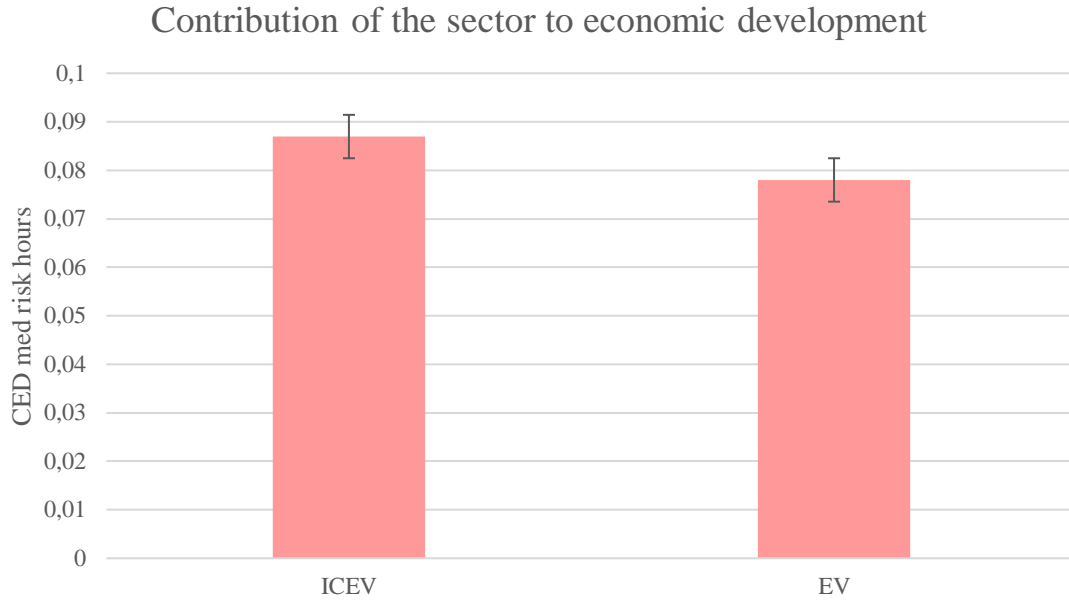

Supplement: 11367_2021_1988_MOESM1_ESM.pdf [file 11367_2021_1988_MOESM1_ESM.pdf]
